# Supplementary material for: A New Class of Cell Wall-Recycling l,d-Carboxypeptidase Determines β-Lactam Susceptibility and Morphogenesis in Acinetobacter baumannii
Source: PubMed Central journal article supplement (PMC8649774; doi:10.1128/mbio.02786-21), 2021-12-07
Supplement: mbio.02786-21-sf001.pdf [file mbio.02786-21-sf001.pdf]

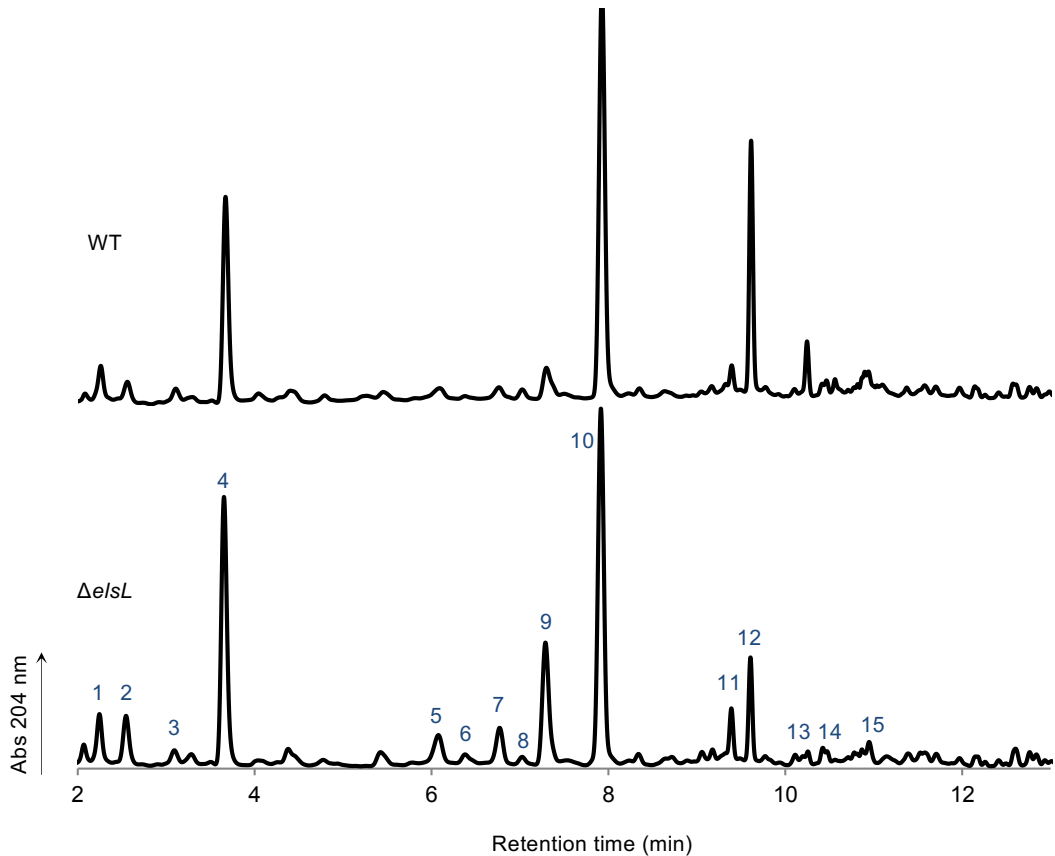

| #  | Label              | Description                                                           | Expected m/z<br>[M+H] <sup>+</sup> | Expected m/z<br>[M+H] <sup>+</sup> +2 | Expected m/z<br>[M+H] <sup>+</sup> +3 | Observed<br>m/z | Difference |
|----|--------------------|-----------------------------------------------------------------------|------------------------------------|---------------------------------------|---------------------------------------|-----------------|------------|
| 1  | M3                 | Monomer disaccharide tripeptide                                       | <b>871.3784</b>                    | 436.1931                              | 291.1314                              | 871.3450        | 0.0334     |
| 2  | M4 <sup>Gly</sup>  | Monomer disaccharide tetrapeptide with Gly at fourth position         | <b>928.3999</b>                    | 464.7039                              | 310.1385                              | 928.3572        | 0.0427     |
| 3  | M5 <sup>Gly</sup>  | Monomer disaccharide pentapeptide with Gly at fifth position          | <b>999.4370</b>                    | 500.2224                              | 333.8176                              | 999.3960        | 0.041      |
| 4  | M4                 | Monomer disaccharide tetrapeptide                                     | <b>942.4155</b>                    | 471.7117                              | 314.8104                              | 942.3746        | 0.0409     |
| 5  | D34 <sup>Gly</sup> | Dimer disaccharide tri-tetrapeptide with Gly at fourth position       | 1780.7599                          | <b>890.8839</b>                       | 594.2585                              | 890.8522        | 0.0317     |
| 6  | D33                | Dimer disaccharide tri-tripeptide                                     | 1723.7384                          | <b>862.3731</b>                       | 575.2514                              | 862.3391        | 0.0340     |
| 7  | D44 <sup>Gly</sup> | Dimer disaccharide tetra-tetrapeptide with Gly at fourth position     | 1851.7970                          | <b>926.4024</b>                       | 617.9376                              | 926.3626        | 0.0398     |
| 8  | D43                | Dimer disaccharide tetra-tripeptide                                   | 1794.7755                          | <b>897.8917</b>                       | 598.9304                              | 897.8583        | 0.0334     |
| 9  | D34                | Dimer disaccharide tri-tetrapeptide                                   | 1794.7755                          | <b>897.8917</b>                       | 598.9304                              | 897.8522        | 0.0395     |
| 10 | D44                | Dimer disaccharide tetra-tetrapeptide                                 | 1865.8126                          | <b>933.4102</b>                       | 622.6094                              | 933.3690        | 0.0412     |
| 11 | T434/T344          | Trimer disaccharide tetra-tri-tetrapeptide/<br>tri-tetra-tetrapeptide | 2718.1727                          | 1359.5903                             | <b>906.7295</b>                       | 906.6955        | 0.0340     |
| 12 | T444               | Trimer disaccharide tetra-tetra-tetrapeptide                          | 2789.2089                          | 1395.1088                             | <b>930.4085</b>                       | 930.3705        | 0.0380     |
| 13 | T14444             | Tetramer disaccharide tetra-tetra-tetra-tetrapeptide                  | 3712.6069                          | 1856.8074                             | <b>1238.2075</b>                      | 1238.1420       | 0.0655     |
| 14 | D44N               | Anhydrous dimer disaccharide tetra-tetrapeptide                       | 1845.7864                          | <b>923.3971</b>                       | 615.9340                              | 923.3565        | 0.0406     |
| 15 | T444N              | Anhydrous trimer disaccharide tetra-tetra-tetrapeptide                | 2769.1836                          | 1385.0957                             | <b>923.7331</b>                       | 923.6984        | 0.0347     |
