# Supplementary material for: A New Class of Cell Wall-Recycling l,d-Carboxypeptidase Determines β-Lactam Susceptibility and Morphogenesis in Acinetobacter baumannii
Source: PubMed Central journal article supplement (PMC8649774; doi:10.1128/mbio.02786-21), 2021-12-07

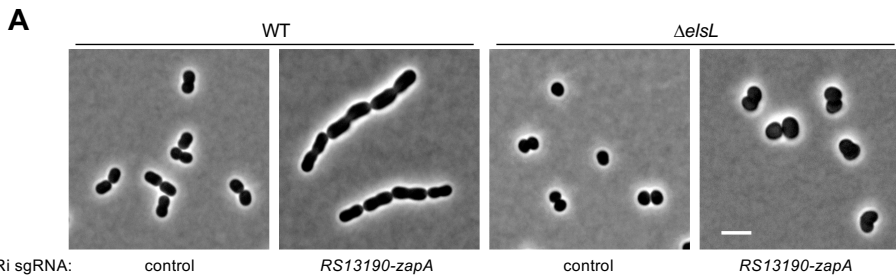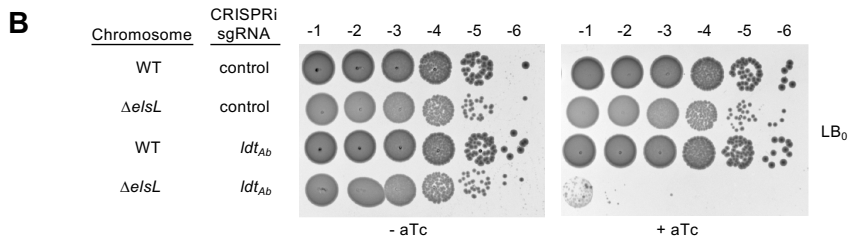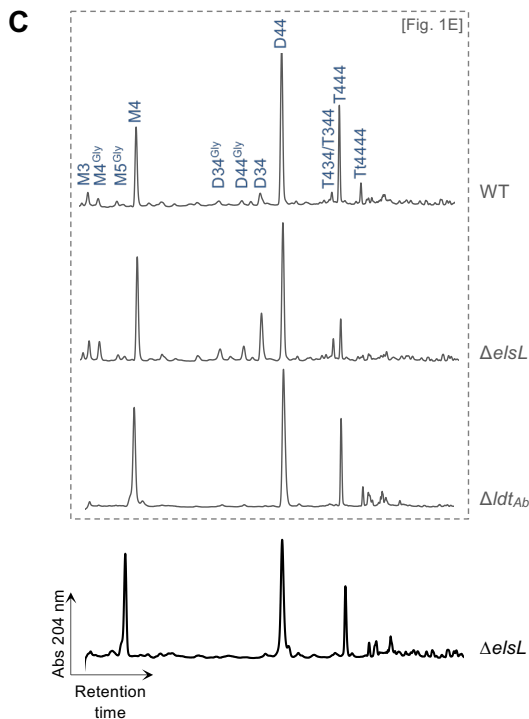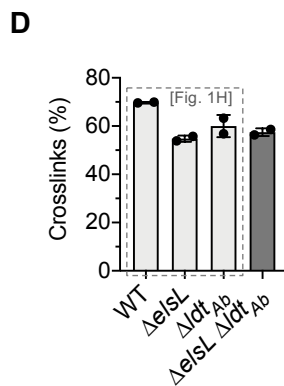

Supplement: mbio.02786-21-sf003.pdf [file mbio.02786-21-sf003.pdf]
