# Supplementary material for: A New Class of Cell Wall-Recycling l,d-Carboxypeptidase Determines β-Lactam Susceptibility and Morphogenesis in Acinetobacter baumannii
Source: PubMed Central journal article supplement (PMC8649774; doi:10.1128/mbio.02786-21), 2021-12-07
Supplement: mbio.02786-21-st001.pdf [file mbio.02786-21-st001.pdf]

**Table S1. Quantification of genetic interactions with  $\Delta elsL$ .**

|                                                                  | sgRNA:           |                  |                 |                  |                  |
|------------------------------------------------------------------|------------------|------------------|-----------------|------------------|------------------|
|                                                                  | control          | <i>ldtAb</i>     | <i>RS13190</i>  | <i>blhA</i>      | <i>miaF</i>      |
| Growth phenotype of single CRISPRi strain (A) <sup>1</sup>       | 1.00<br>(n = 20) | 1.00<br>(n = 12) | 0.8<br>(n = 10) | 1.03<br>(n = 9)  | 0.83<br>(n = 7)  |
| Growth phenotype of single $\Delta elsL$ strain (B) <sup>2</sup> | 0.87<br>(n = 16) | –                | –               | –                | –                |
| Expected growth phenotype of double lesion strain (A*B)          | –                | 0.87             | 0.69            | 0.90             | 0.73             |
| Observed growth phenotype of double lesion strain <sup>3</sup>   | –                | 0.28*<br>(n = 8) | n.d.            | 0.56*<br>(n = 5) | 0.47*<br>(n = 5) |

<sup>1</sup>Mean colony diameter, relative to WT control, of single CRISPRi lesion (sgRNA in WT background)

<sup>2</sup>Mean colony diameter, relative to WT control, of single  $\Delta elsL$  lesion (control sgRNA in  $\Delta elsL$  background)

<sup>3</sup>Mean colony diameter, relative to WT control, of double lesion (sgRNA in  $\Delta elsL$  background)

n, number of measured colonies

–, not applicable

n.d., colonies not detected

\*, p < 0.001 in one sample t test using the expected growth phenotype as reference value.
