# Supplementary material for: A New Class of Cell Wall-Recycling l,d-Carboxypeptidase Determines β-Lactam Susceptibility and Morphogenesis in Acinetobacter baumannii
Source: PubMed Central journal article supplement (PMC8649774; doi:10.1128/mbio.02786-21), 2021-12-07
Supplement: mbio.02786-21-st002.pdf [file mbio.02786-21-st002.pdf]

**Table S2. Strains, plasmids, and primers used in this study**

**Strains**

| Strain                     | Genotype or description                                                                                          | Reference  |
|----------------------------|------------------------------------------------------------------------------------------------------------------|------------|
| <b><i>A. baumannii</i></b> |                                                                                                                  |            |
| ATCC 17978                 | cerebrospinal fluid isolate                                                                                      | (1)        |
| EGA738                     | ATCC 17978 $\Delta elsL$ (ACX60_RS03475)                                                                         | (2)        |
| EGA739                     | ATCC 17978 $\Delta dt_{Ab}$ (ACX60_RS05685)                                                                      | (2)        |
| EGA740                     | ATCC 17978 $\Delta elsL \Delta dt_{Ab}$                                                                          | This study |
| YDA350                     | ATCC 17978 with pYDE153 (vector)                                                                                 | This study |
| YDA475                     | EGA738 ( $\Delta elsL$ ) with pEGE305 (vector)                                                                   | This study |
| YDA515                     | EGA738 ( $\Delta elsL$ ) with pYDE350 (P(IPTG)- <i>elsL</i> -3xFLAG)                                             | This study |
| YDA516                     | EGA738 ( $\Delta elsL$ ) with pYDE351 (P(IPTG)- <i>ldcA</i> -3xFLAG)                                             | This study |
| YDA519                     | EGA739 ( $\Delta dt_{Ab}$ ) with pEGE305 (vector)                                                                | This study |
| YDA518                     | EGA739 ( $\Delta dt_{Ab}$ ) with pYDE240 (P(IPTG)- <i>ldt_{Ab}</i> )                                             | This study |
| YDA004                     | ATCC 17978 <i>attTn7::tetR-tetP-dcas9-rnnBT1-T7Te Gm<sup>r</sup></i>                                             | (3)        |
| YDA007                     | YDA004 with pYDE007 (non-targeting control)                                                                      | (3)        |
| YDA232                     | YDA004 with pYDE044 (sgRNA <sub><i>ldtAb</i></sub> )                                                             | This study |
| YDA549                     | YDA004 with pYDE381 (sgRNA <sub><i>blhA</i></sub> )                                                              | This study |
| YDA535                     | YDA004 with pYDE376 (sgRNA <sub><i>RS13190</i></sub> )                                                           | This study |
| YDA533                     | YDA004 with pYDE374 (sgRNA <sub><i>mIaF</i></sub> )                                                              | This study |
| YDA186                     | ATCC 17978 $\Delta elsL \text{ attTn7::tetR-tetP-dcas9-rnnBT1-T7Te Gm}^r$                                        | This study |
| YDA281                     | YDA186 with pYDE007 (non-targeting control)                                                                      | This study |
| YDA284                     | YDA186 with pYDE044 (sgRNA <sub><i>ldtAb</i></sub> )                                                             | This study |
| YDA550                     | YDA186 with pYDE381 (sgRNA <sub><i>blhA</i></sub> )                                                              | This study |
| YDA539                     | YDA186 with pYDE376 (sgRNA <sub><i>RS13190</i></sub> )                                                           | This study |
| YDA537                     | YDA186 with pYDE374 (sgRNA <sub><i>mIaF</i></sub> )                                                              | This study |
| YDA315                     | EGA740 ( $\Delta elsL \Delta dt_{Ab}$ ) <i>ampG</i> (W99*)                                                       | This study |
| YDA331                     | EGA740 ( $\Delta elsL \Delta dt_{Ab}$ ) <i>mpl</i> (A335T)                                                       | This study |
| YDA380                     | EGA740 ( $\Delta elsL \Delta dt_{Ab}$ ) <i>ltgF::IS</i>                                                          | This study |
| EGA516                     | ATCC 17978 $\Delta ampG$                                                                                         | (4)        |
| EGA692                     | ATCC 17978 $\Delta pbp2$                                                                                         | (4)        |
| YDA414                     | ATCC 17978 $\Delta elsL \Delta dt_{Ab} \Delta ampG$                                                              | This study |
| YDA411                     | ATCC 17978 $\Delta elsL \Delta ampG$                                                                             | This study |
| AB5075-UW                  | bone isolate/osteomyelitis                                                                                       | (5)        |
| AB07436                    | AB5075-UW <i>ltgF</i> 118::T26                                                                                   | (5)        |
| AB03078                    | AB5075-UW <i>ampG</i> 117::T26                                                                                   | (5)        |
| <b><i>E. coli</i></b>      |                                                                                                                  |            |
| DH5 $\alpha$               | <i>supE44 \Delta lacU169</i> ( $\phi$ 80 <i>lacZ</i> $\Delta$ M15) <i>hsdR17 recA1 endA1 gyrA96 thi-1 relA1</i>  | (6)        |
| DH5 $\lambda$ pir          | DH5 $\alpha$ ( $\lambda$ pir) <i>tet::Mu recA</i>                                                                | (7)        |
| XL1-blue                   | <i>recA1 endA1 gyrA96 thi-1 hsdR17 supE44 relA1 lac</i> [F' <i>proAB lac<sup>f</sup></i> $\Delta$ M15 Tn10 Tc']] | Stratagene |

## Plasmids

| Plasmid | Description                                                                                                                                               | Reference  |
|---------|-----------------------------------------------------------------------------------------------------------------------------------------------------------|------------|
| pUC18   | <i>oriColE1</i> MCS Cb <sup>r</sup>                                                                                                                       | (8)        |
| pSR47S  | Conditionally replicating allele exchange plasmid, Km <sup>r</sup> ( <i>oriTRP4 oriR6K sacB</i> Km <sup>r</sup> )                                         | (9)        |
| pJB4648 | Conditionally replicating allele exchange plasmid, Gm <sup>r</sup> ( <i>oriTRP4 oriR6K sacB</i> Gm <sup>r</sup> )                                         | (9)        |
| pEGE305 | P(IPTG) shuttle vector ( <i>ori-pBR322 ori-pWH1277 bla::lacI<sup>q</sup>-T5lacP</i> , Tc <sup>r</sup> )                                                   | (4)        |
| pYDE153 | P(IPTG) shuttle vector ( <i>ori-pBR322 ori-pWH1277 bla::lacI<sup>q</sup>-T5lacP-MCS</i> , Tc <sup>r</sup> )                                               | (2)        |
| pDL1100 | <i>Himar1 mariner</i> (Km <sup>r</sup> ) delivery plasmid, C9 transposase, <i>ori pSC101</i> Cb <sup>r</sup>                                              | (2)        |
| pYDE009 | <i>dcas9</i> miniTn7 delivery plasmid ( <i>oriColE1</i> miniTn7:: <i>tetR-tetP-dcas9-rmBT1-T7Te</i> , Gm <sup>r</sup> , Cb <sup>r</sup> )                 | (3)        |
| pYDE007 | sgRNA delivery plasmid non-targeting control guide ( <i>ori-pBR322 ori-pWH1277 P<sub>J23119</sub>-sgRNA<sub>mrfp</sub>-terminator</i> , Cb <sup>r</sup> ) | (3)        |
| pYDE044 | pYDE007 derivative with sgRNA <sub><i>ldtAb</i></sub>                                                                                                     | This study |
| pYDE381 | pYDE007 derivative with sgRNA <sub><i>blhA</i></sub>                                                                                                      | This study |
| pYDE376 | pYDE007 derivative with sgRNA <sub><i>RS13190</i></sub>                                                                                                   | This study |
| pYDE374 | pYDE007 derivative with sgRNA <sub><i>mIaF</i></sub>                                                                                                      | This study |
| pEGE268 | pSR47S:: <i>ΔelsL</i> allele exchange construct                                                                                                           | (2)        |
| pEGE271 | pSR47S:: <i>ΔldtAb</i> allele exchange construct                                                                                                          | (2)        |
| pYDE388 | pJB4648:: <i>ΔltgF</i> allele exchange construct                                                                                                          | This study |
| pYDE231 | pUC18:: <i>ldtAb</i>                                                                                                                                      | This study |
| pYDE240 | pEGE305:: <i>ldtAb</i> (P(IPTG)- <i>ldtAb</i> )                                                                                                           | This study |
| pYDE350 | pEGE305:: <i>elsL-3xFLAG</i> (P(IPTG)- <i>elsL-3xFLAG</i> )                                                                                               | This study |
| pYDE351 | pEGE305:: <i>ldcA-3xFLAG</i> (P(IPTG)- <i>ldcA-3xFLAG</i> )                                                                                               | This study |
| pYDE342 | pUC18:: <i>elsL</i> (XbaI hexameric sequence in-frame)                                                                                                    | This study |
| pYDE063 | pUC18:: <i>ldtAb</i> (XbaI hexameric sequence in-frame)                                                                                                   | This study |
| pYDE343 | pUC18:: <i>ldcA</i> (XbaI hexameric sequence in-frame)                                                                                                    | This study |
| pYDE346 | pUC18:: <i>elsL-3xFLAG</i>                                                                                                                                | This study |
| pYDE347 | pUC18:: <i>ldcA-3xFLAG</i>                                                                                                                                | This study |
| pYDE386 | pUC18:: <i>elsL-msGFP2</i>                                                                                                                                | This study |
| pYDE387 | pUC18:: <i>ldtAb-msGFP2</i>                                                                                                                               | This study |
| pYDE389 | pEGE305:: <i>elsL-msGFP2</i> (P(IPTG)- <i>elsL-msGFP2</i> )                                                                                               | This study |
| pYDE390 | pEGE305:: <i>ldtAb-msGFP2</i> (P(IPTG)- <i>ldtAb-msGFP2</i> )                                                                                             | This study |
| pYDE281 | pUC18:: <i>elsL-6xHis</i>                                                                                                                                 | This study |
| pYDE324 | pUC18:: <i>ldcA-6xHis</i>                                                                                                                                 | This study |
| pYDE290 | pET28b:: <i>elsL-6xHis</i>                                                                                                                                | This study |
| pYDE328 | pET28b:: <i>ldcA-6xHis</i>                                                                                                                                | This study |

## Oligonucleotide primers and gene fragment

| Primer or fragment name                                 | Sequence (5' – 3'; restriction site underlined if present)                                                                                                                                                                                                                                                                                                                                                                                                                                                                                                                                                                                                                                                                                                                                                                               | RE site(s)     |
|---------------------------------------------------------|------------------------------------------------------------------------------------------------------------------------------------------------------------------------------------------------------------------------------------------------------------------------------------------------------------------------------------------------------------------------------------------------------------------------------------------------------------------------------------------------------------------------------------------------------------------------------------------------------------------------------------------------------------------------------------------------------------------------------------------------------------------------------------------------------------------------------------------|----------------|
| <b>Complementation and localization experiments</b>     |                                                                                                                                                                                                                                                                                                                                                                                                                                                                                                                                                                                                                                                                                                                                                                                                                                          |                |
| Bam-elsL-F                                              | GATATCGGATCCAGTTGAGTTGATATAAGAGAAGAAATTCG                                                                                                                                                                                                                                                                                                                                                                                                                                                                                                                                                                                                                                                                                                                                                                                                | BamHI          |
| Xba-elsL-R                                              | GATCATTCTAGAGGTTAAAGATTGTTTCAGACAAATAAAC                                                                                                                                                                                                                                                                                                                                                                                                                                                                                                                                                                                                                                                                                                                                                                                                 | XbaI           |
| Bam-ldcA-F                                              | GATATCGGATCCAGTTGAGTTGATATAAGAGAAGAAATTCGATGTCTCTGTTTCACTTAATTGC                                                                                                                                                                                                                                                                                                                                                                                                                                                                                                                                                                                                                                                                                                                                                                         | BamHI          |
| Xba-ldcA-R                                              | GATCATTCTAGACATTTTAAGAACAGGATGACCGC                                                                                                                                                                                                                                                                                                                                                                                                                                                                                                                                                                                                                                                                                                                                                                                                      | XbaI           |
| ldtAb-BamHI-F                                           | GATATCGGATCCGCTTATATGAAAATTCTTAAGGTTG                                                                                                                                                                                                                                                                                                                                                                                                                                                                                                                                                                                                                                                                                                                                                                                                    | BamHI          |
| ldtAb-XbaI-R                                            | GATCATTCTAGATTCTAAGAATTTAACAGTTACGCC                                                                                                                                                                                                                                                                                                                                                                                                                                                                                                                                                                                                                                                                                                                                                                                                     | XbaI           |
| Ldt-OE-F                                                | TGCATAGAATTCCAAAAGTCTACTGCAAGAAGAAACG                                                                                                                                                                                                                                                                                                                                                                                                                                                                                                                                                                                                                                                                                                                                                                                                    | EcoRI          |
| Ldt-OE-R                                                | GCTGAACTGCAGGAAACAGAAGCTAAAATGCAAACC                                                                                                                                                                                                                                                                                                                                                                                                                                                                                                                                                                                                                                                                                                                                                                                                     | PstI           |
| elsL-C138S-F                                            | TAGATTCAATTGTGAGCGGATAACAATTC                                                                                                                                                                                                                                                                                                                                                                                                                                                                                                                                                                                                                                                                                                                                                                                                            |                |
| elsL-C138S-R                                            | GATCATTCGAATAGACCCATGTGACATTGGAAC                                                                                                                                                                                                                                                                                                                                                                                                                                                                                                                                                                                                                                                                                                                                                                                                        | BstBI          |
| msGFP2_F                                                | GTCAGAATTC <sup>1</sup> TTAAGAAGGAGATATACATATGGATTCTACTGAATCTTTATTAC                                                                                                                                                                                                                                                                                                                                                                                                                                                                                                                                                                                                                                                                                                                                                                     | EcoRI          |
| msGFP2_R                                                | A <sup>2</sup> ACTGCAGGTCTGGACATTTAAG                                                                                                                                                                                                                                                                                                                                                                                                                                                                                                                                                                                                                                                                                                                                                                                                    | PstI           |
| <b>Gene deletion</b>                                    |                                                                                                                                                                                                                                                                                                                                                                                                                                                                                                                                                                                                                                                                                                                                                                                                                                          |                |
| D-RS13100-up-F                                          | TTCGTGGATCCCAGTAATACCGTGGACTTGAACAG                                                                                                                                                                                                                                                                                                                                                                                                                                                                                                                                                                                                                                                                                                                                                                                                      | BamHI          |
| D-RS13100-up-R                                          | GGGAGGGTACCTGGTTTATACATAAAAACTTCCAAACAAC                                                                                                                                                                                                                                                                                                                                                                                                                                                                                                                                                                                                                                                                                                                                                                                                 | KpnI           |
| D-RS13100-dw-F                                          | CTGAGGGTACCGATATCATTAAAGTGCCTAATTTATAG                                                                                                                                                                                                                                                                                                                                                                                                                                                                                                                                                                                                                                                                                                                                                                                                   | KpnI           |
| D-RS13100-dw-R                                          | CTTGCGCGGCCGCCTTTGTAGTCTTTGATATTGTCC                                                                                                                                                                                                                                                                                                                                                                                                                                                                                                                                                                                                                                                                                                                                                                                                     | NotI           |
| <b>Overexpression and purification of elsL and ldcA</b> |                                                                                                                                                                                                                                                                                                                                                                                                                                                                                                                                                                                                                                                                                                                                                                                                                                          |                |
| elsL-NcoI-FOR                                           | TGCATACCATGGCTCAAATAGTTGAGTTGATATAAGAG                                                                                                                                                                                                                                                                                                                                                                                                                                                                                                                                                                                                                                                                                                                                                                                                   | NcoI           |
| elsL-his-EcoRI-REV                                      | GATCATGAATTC <sup>1</sup> TTAGTGGTGGTGGTGGTGGTGGTAAAGATTGTTTCAGACAAATAAAC                                                                                                                                                                                                                                                                                                                                                                                                                                                                                                                                                                                                                                                                                                                                                                | EcoRI          |
| ldcA-NcoI-FOR                                           | TGCATACCATGGCATGATATACATTTCTGTTTCTGTTGTC                                                                                                                                                                                                                                                                                                                                                                                                                                                                                                                                                                                                                                                                                                                                                                                                 | NcoI           |
| ldcA-his-EcoRI-REV                                      | GATCATGAATTC <sup>1</sup> TTAGTGGTGGTGGTGGTGGTGCATTTAAGAACAGGATGACCGCT                                                                                                                                                                                                                                                                                                                                                                                                                                                                                                                                                                                                                                                                                                                                                                   | EcoRI          |
| <b>CRISPRi</b>                                          |                                                                                                                                                                                                                                                                                                                                                                                                                                                                                                                                                                                                                                                                                                                                                                                                                                          |                |
| SGR29-F                                                 | TTACACTAGTAGCAGATACTTTATTAGGGTTCAGGTTTTAGAGCTAGAAATAGCAAG                                                                                                                                                                                                                                                                                                                                                                                                                                                                                                                                                                                                                                                                                                                                                                                | SpeI           |
| SGR45-F                                                 | TTACACTAGTTTGATAAGCATGACGGACAGCTTCGTTTTAGAGCTAGAAATAGCAAG                                                                                                                                                                                                                                                                                                                                                                                                                                                                                                                                                                                                                                                                                                                                                                                | SpeI           |
| SGR60-F                                                 | TTACACTAGTCGCTGTAATTGTTCTAACATAACGGTTTTAGAGCTAGAAATAGCAAG                                                                                                                                                                                                                                                                                                                                                                                                                                                                                                                                                                                                                                                                                                                                                                                | SpeI           |
| SGR58-F                                                 | TTACACTAGTAGAGAGGAGTTTTATTATTCATAAGTTTTAGAGCTAGAAATAGCAAG                                                                                                                                                                                                                                                                                                                                                                                                                                                                                                                                                                                                                                                                                                                                                                                | SpeI           |
| SGR-R (BglII) (ref. 3)                                  | AAGTGGGCCCCAGATCTAAGCTTCAAAAAAAGCACCGAC                                                                                                                                                                                                                                                                                                                                                                                                                                                                                                                                                                                                                                                                                                                                                                                                  | Apal,<br>BglII |
| <b>Gene fragment</b>                                    |                                                                                                                                                                                                                                                                                                                                                                                                                                                                                                                                                                                                                                                                                                                                                                                                                                          |                |
| msGFP2<br>(for C-terminal fusion,<br>codon optimized)   | AGTTCGTCTAGAGGCGGCGGCGGCGGCATGGATTCTACTGAATCTTTATTCACTGGTGTGT<br>TCCAATTTTAGTTGAATTAGATGGTGTGTTAACGGTCACAAATCTCTGTTTCGTGGTGAAGG<br>TGAAGGTGATGCTACTAACGGTAAATTAACCTTTAAAATTCATTTGACTACTGGTAAATTACCA<br>GTTCCATGGCCAACCTTTAGTTACTACTTTAACTTATGGTGTTCATGTTTCTCTCGTTATCCAG<br>ATCACATGAAACAACACGATTTCTTCAAATCTGCTATGCCAGAAGGTTATGTTCAAGAACGTA<br>CTATTACTTTCAAAGATGATGGTACTTATAAACTCGTGTGGAAGTTAAATTCGAAGGTGATA<br>CTTTAGTTAACCCTATTGAATTTAAAGGATTGATTTCAAAGAAGATGGTAACATTTTAGGTCA<br>CAAATTAGAATATAACTATAACTCTCACAACTTTATATTACTGCTGATAAAACAAAAAACGGT<br>ATTAAGCTAACTTCAAAATTCGTCCAAACGTTGAAGATGGTTCTGTTCAATTAGCTGATCACT<br>ATCAACAAAACACTCCAATTGGTGTGGTCCAGTTTTATTACCAGATAACCACTATTTATCTAC<br>TCAATCTAAATTATCTAAAGATCCAAACGAAAAACGTGATCACATGGTTTTATTAGAGTTTGT<br>ACTGCTGCTGGTATTACTGGTGGTTCTGGTGGTTCTTAAATGTCCAGACCTGCA <sup>2</sup> TTCTG | XbaI,<br>PstI  |

## Supplemental References

1. Bouvet P, Grimont P. 1986. Taxonomy of the Genus *Acinetobacter* with the Recognition of *Acinetobacter baumannii* sp. nov. *Acinetobacter haemolyticus* sp. nov. *Acinetobacter johnsonii* sp. nov. and *Acinetobacter junii* sp. nov. and Emended Descriptions of *Acinetobacter calcoaceticus* and *Acinetobacter lwofii*. *International Journal of Systematic Bacteriology* 36:228-240.
2. Geisinger E, Mortman NJ, Dai Y, Cokol M, Syal S, Farinha A, Fisher DG, Tang AY, Lazinski DW, Wood S, Anthony J, van Opijnen T, Isberg RR. 2020. Antibiotic susceptibility signatures identify potential antimicrobial targets in the *Acinetobacter baumannii* cell envelope. *Nature Communications* 11:4522.
3. Bai J, Dai Y, Farinha A, Tang AY, Syal S, Vargas-Cuebas G, van Opijnen T, Isberg RR, Geisinger E. 2021. Essential gene analysis in *Acinetobacter baumannii* by high-density transposon mutagenesis and CRISPR interference. *J Bacteriol* 203.
4. Geisinger E, Mortman NJ, Vargas-Cuebas G, Tai AK, Isberg RR. 2018. A global regulatory system links virulence and antibiotic resistance to envelope homeostasis in *Acinetobacter baumannii*. *PLoS Pathog* 14:e1007030.
5. Gallagher LA, Ramage E, Weiss EJ, Radey M, Hayden HS, Held KG, Huse HK, Zurawski DV, Brittnacher MJ, Manoil C. 2015. Resources for Genetic and Genomic Analysis of Emerging Pathogen *Acinetobacter baumannii*. *J Bacteriol* 197:2027-35.
6. Hanahan D, Jessee J, Bloom FR. 1991. Plasmid transformation of *Escherichia coli* and other bacteria. *Methods Enzymol* 204:63-113.
7. Kolter R, Inuzuka M, Helinski DR. 1978. Trans-complementation-dependent replication of a low molecular weight origin fragment from plasmid R6K. *Cell* 15:1199-208.
8. Yanisch-Perron C, Vieira J, Messing J. 1985. Improved M13 phage cloning vectors and host strains: nucleotide sequences of the M13mp18 and pUC19 vectors. *Gene* 33:103-19.
9. Andrews HL, Vogel JP, Isberg RR. 1998. Identification of linked *Legionella pneumophila* genes essential for intracellular growth and evasion of the endocytic pathway. *Infect Immun* 66:950-8.
